# Supplementary material for: Tuning the Supramolecular Structures of Metal-Free Porphyrin via Surfactant Assisted Self-Assembly to Enhance Photocatalytic Performance
Source: Nanomaterials (Basel). 2019 Sep 15;9(9):1321. doi: 10.3390/nano9091321 (PMC6781064; doi:10.3390/nano9091321)
Supplement: Supplementary file 1 [file nanomaterials-09-01321-s001.pdf]

# Tuning the Supramolecular Structures of Metal-Free Porphyrin via Surfactant Assisted Self-Assembly to Enhance Photocatalytic Performance

Jinrong Lu, Zihan Li, Weijia An, Li Liu and Wenquan Cui \*

College of Chemical Engineering, Hebei Key Laboratory for Environment Photocatalytic and Electrocatalytic Materials, North China University of Science and Technology, Tangshan 063210, China;

\* Correspondence: wqcui@ncst.edu.cn

## 1. Dynamic light scattering (DLS) characterization

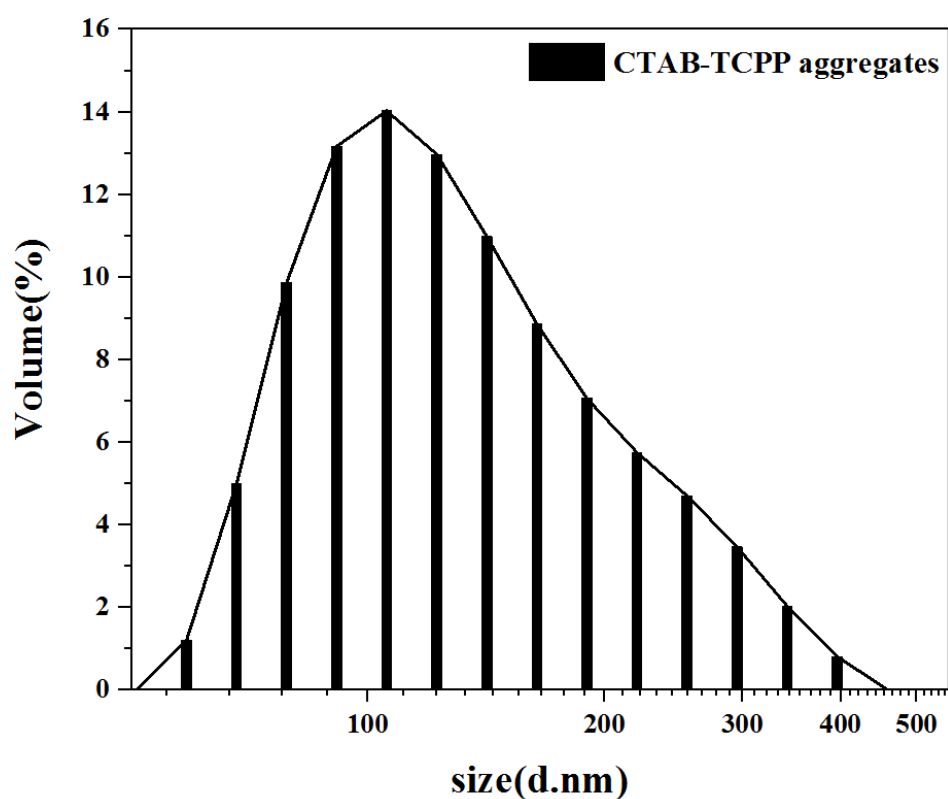

Figure S1. Dynamic light scattering (DLS) of the CTAB-TCPP aggregates.

## 2. The average of decay time of CTAB-TCPP aggregates

Table s1. Time resolved fluorescence fitting results of commercial TCPP、CTAB-TCPP

| Sample          | $\tau 1(\text{ns})$ | $\tau 2(\text{ns})$ | B1       | B2      | Average $\tau(\text{ns})$ |
|-----------------|---------------------|---------------------|----------|---------|---------------------------|
| Commercial TCPP | 773.14              | 2993.67             | 1133.602 | 465.384 | 2136.201                  |
| CTAB-TCPP       | 722.56              | 2610.284            | 1135.783 | 648.01  | 1993.604                  |

## 3. The HPLC data of phenol during the photodegradation

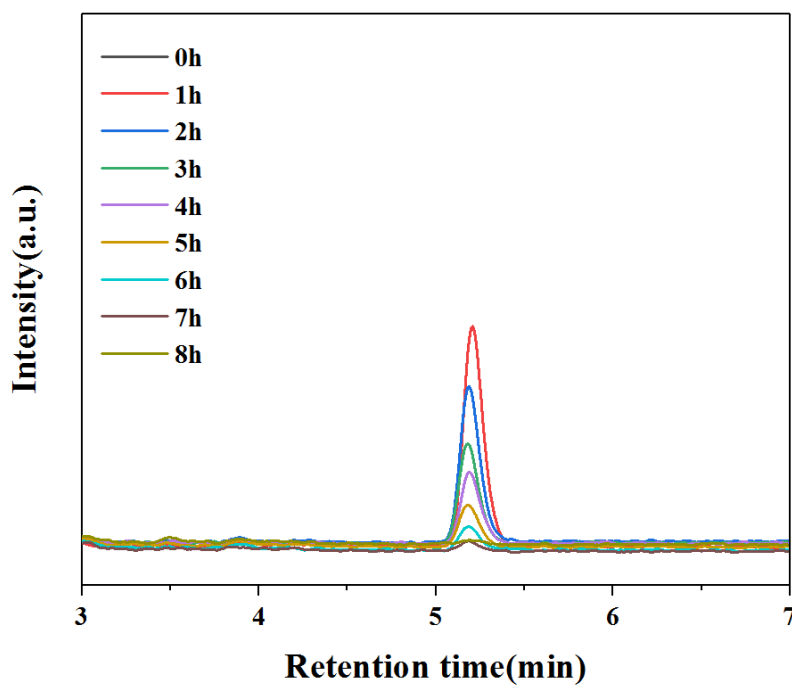

Figure S2. High performance liquid chromatography of phenol peak during degradation by CTAB-TCPP.

#### 4. The three-dimensional chromatograms of phenol peak

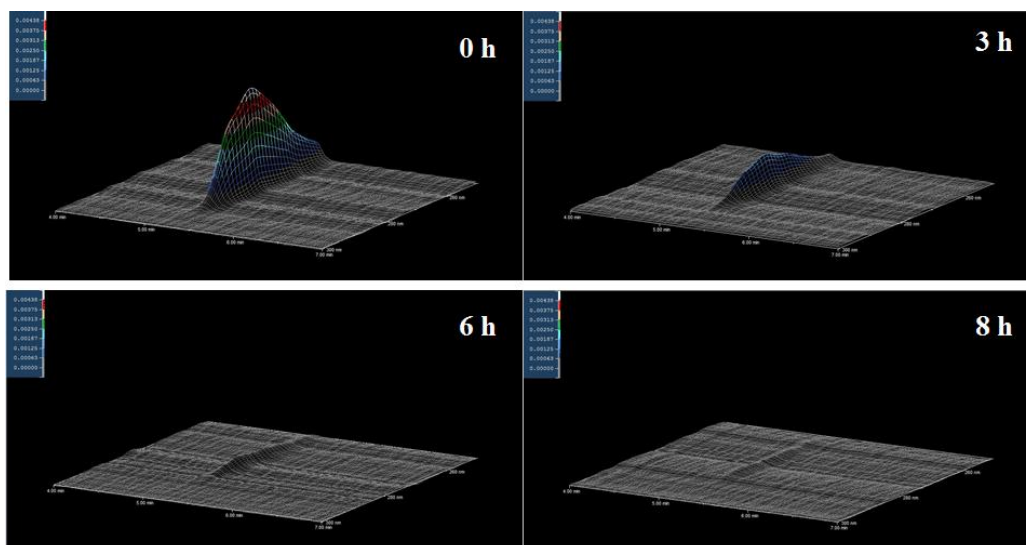

Figure S3. The three-dimensional chromatograms of phenol peak at 0, 3, 6 and 8 h.

#### 5. The Mott-Schottky plots of CTAB-TCPP aggregates and EG-TCPP aggregates

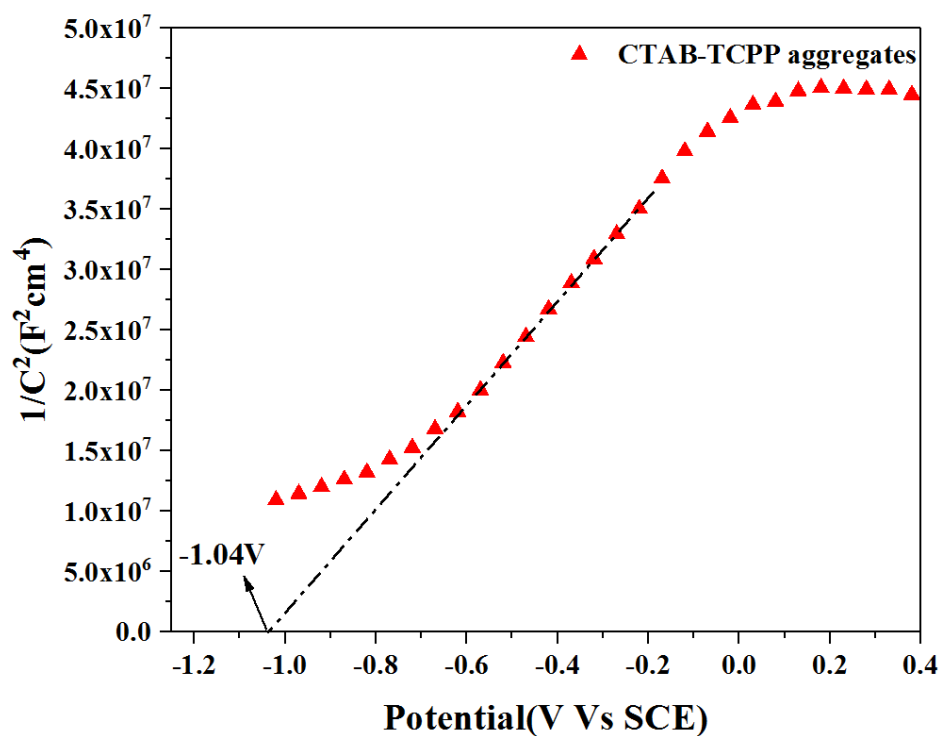

Figure S4. The Mott-Schottky plots of CTAB-TCPP aggregates. The frequency of 1000 Hz was used to detect the flat band position.

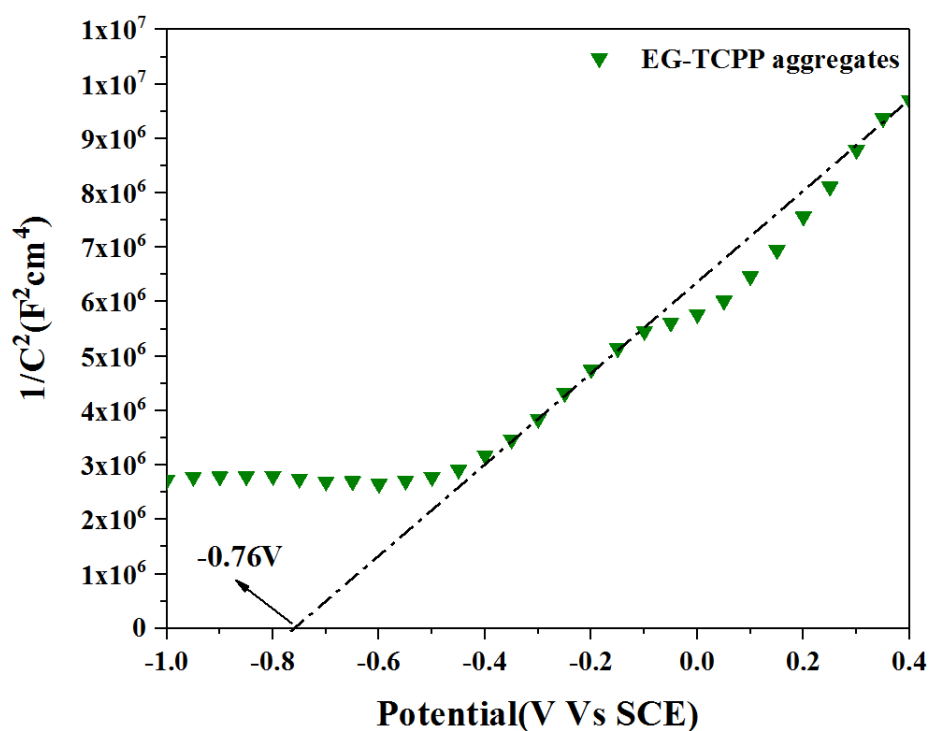

Figure S5. The Mott-Schottky plots of EG-TCPP aggregates. The frequency of 1000 Hz was used to detect the flat band position.

6. The detection of produced  $H_2O_2$  and  $\cdot OH$  with titanium (IV) oxysulfate and coumarin characterized with UV-vis adsorption spectra and PL.

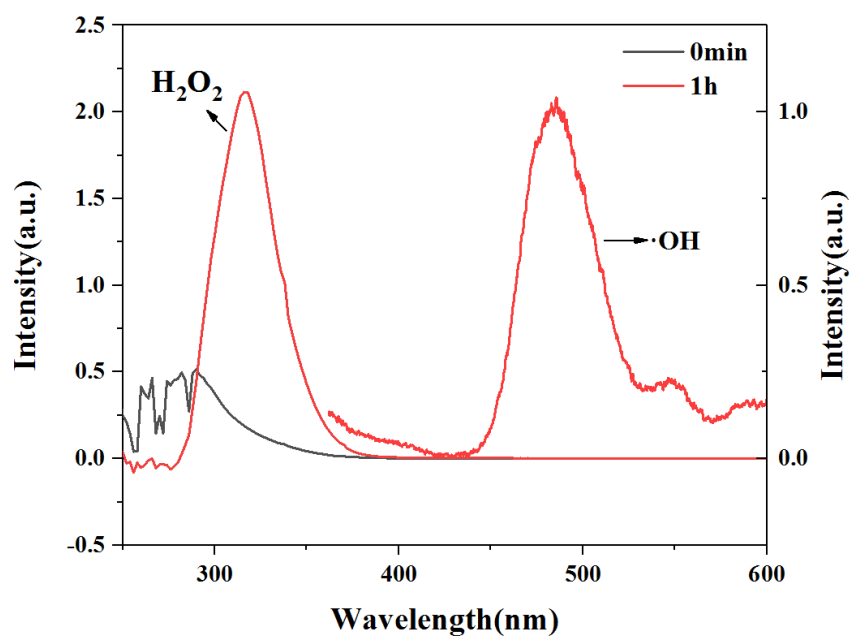

Figure S6. the UV-vis adsorption spectra and PL spectra of titanium (IV) oxysulfate and coumarin for detection of  $H_2O_2$  and  $\cdot OH$ .
